# Supplementary material
Source: PubMed Central journal article supplement (PMC4086753)
Supplement: NIHMS600781-supplement-Supplemental_Figure_S2.pdf [file NIHMS600781-supplement-Supplemental_Figure_S2.pdf]

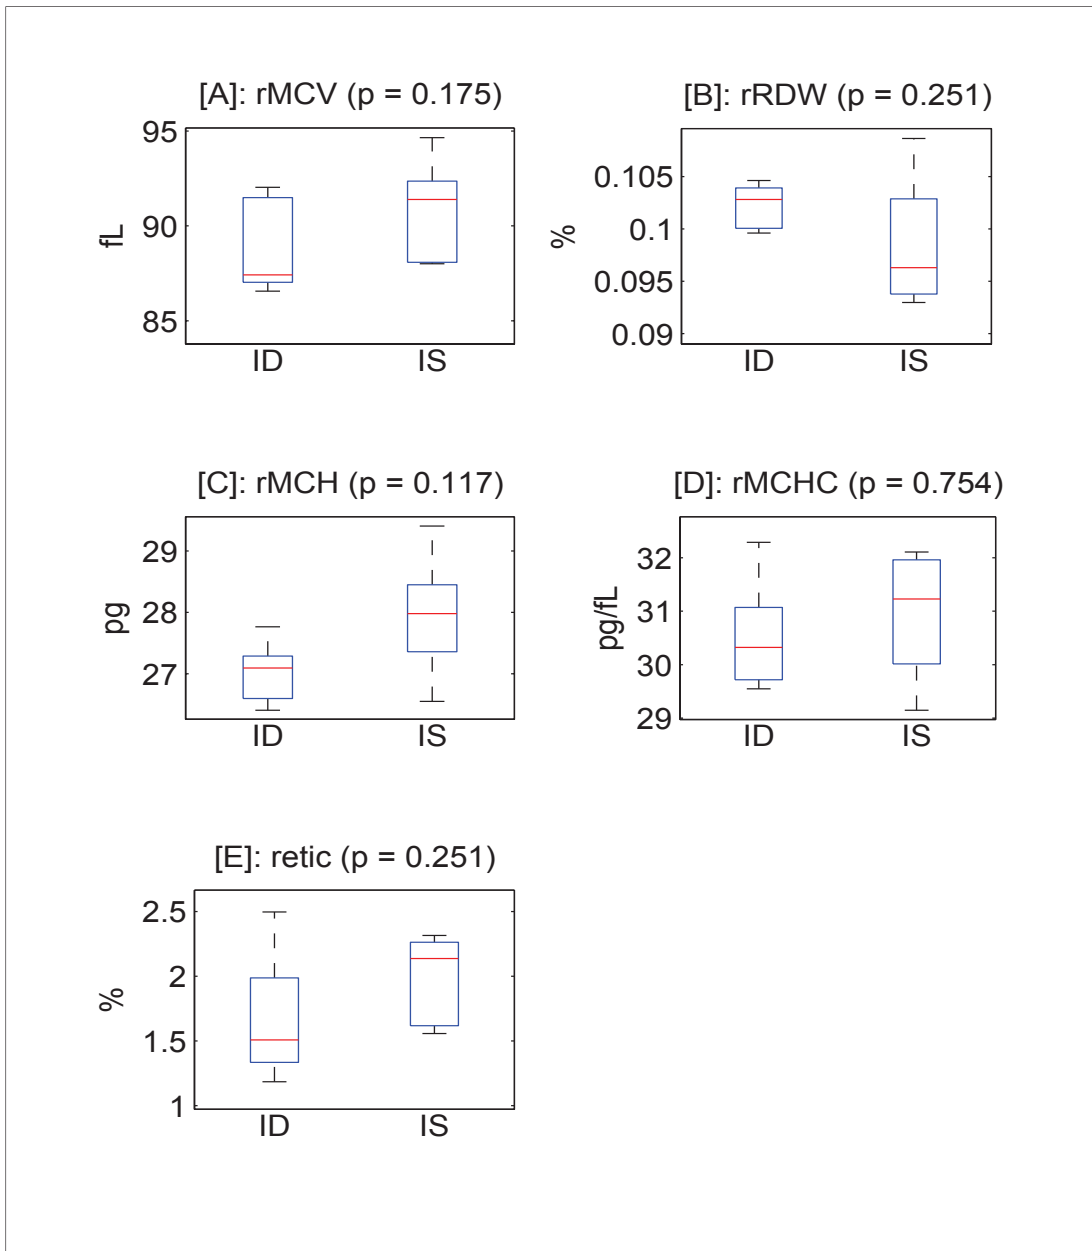

**Figure S2. Reticulocyte characteristics in 2-year-old monkeys.** Boxplots are shown for reticulocyte mean cell volume (rMCV); coefficient of variation of reticulocyte volume (rRDW); mean reticulocyte hemoglobin content (rMCH), mean reticulocyte hemoglobin concentration (rMCHC), and reticulocyte fraction (retic). Each box shows values for 5 animals. The central tendency of each data set is represented by the median and shown as a horizontal red line in the middle of each box. The dispersion of each data set is represented by the inter-quartile range which sets the height of the box, extending from the bottom edge at the 25th percentile to the top edge located at the 75th percentile. P-values for comparisons of the medians using a Kruskal-Wallis test are shown above each plot. None of the comparisons yields a statistically significant difference.
