# Supplementary material
Source: PubMed Central journal article supplement (PMC4086753)
Supplement: NIHMS600781-supplement-Supplemental_Figure_S4.pdf [file NIHMS600781-supplement-Supplemental_Figure_S4.pdf]

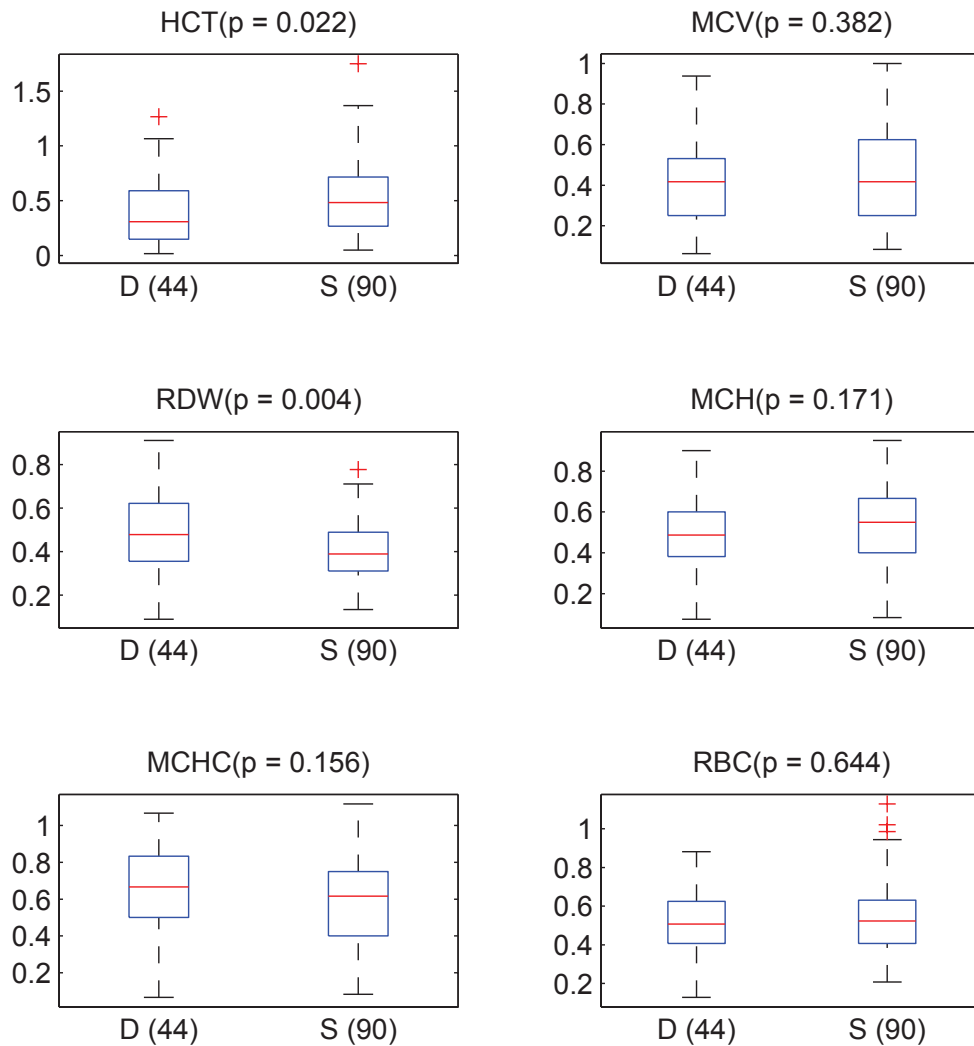

**Figure S4. RBC population characteristics for 2-year-old children.** The boxplots compare RBC population characteristics for 2-year-old children with known in utero iron status: 44 whose mothers had confirmed iron deficiency (D) during pregnancy and 90 whose mothers had confirmed iron sufficiency (S). By design, all complete blood counts had HCT and MCV within the hospital's age-adjusted reference range at the time of measurement. Y-axis units for all plots are scaled such that the hospital reference range falls between 0.0 and 1.0. HCT and RDW were lower in the ID population with statistical significance. No ID children had abnormally high RDW. P-values from two-sided rank sum tests are shown in the titles for each plot. See caption for Figure S2 for more details on boxplots.
