# Supplementary material
Source: PubMed Central journal article supplement (PMC4086753)
Supplement: NIHMS600781-supplement-Supplemental_Figures_S3.pdf [file NIHMS600781-supplement-Supplemental_Figures_S3.pdf]

### Dimensional RBC Clearance Thresholds ( $p = 0.02$ )

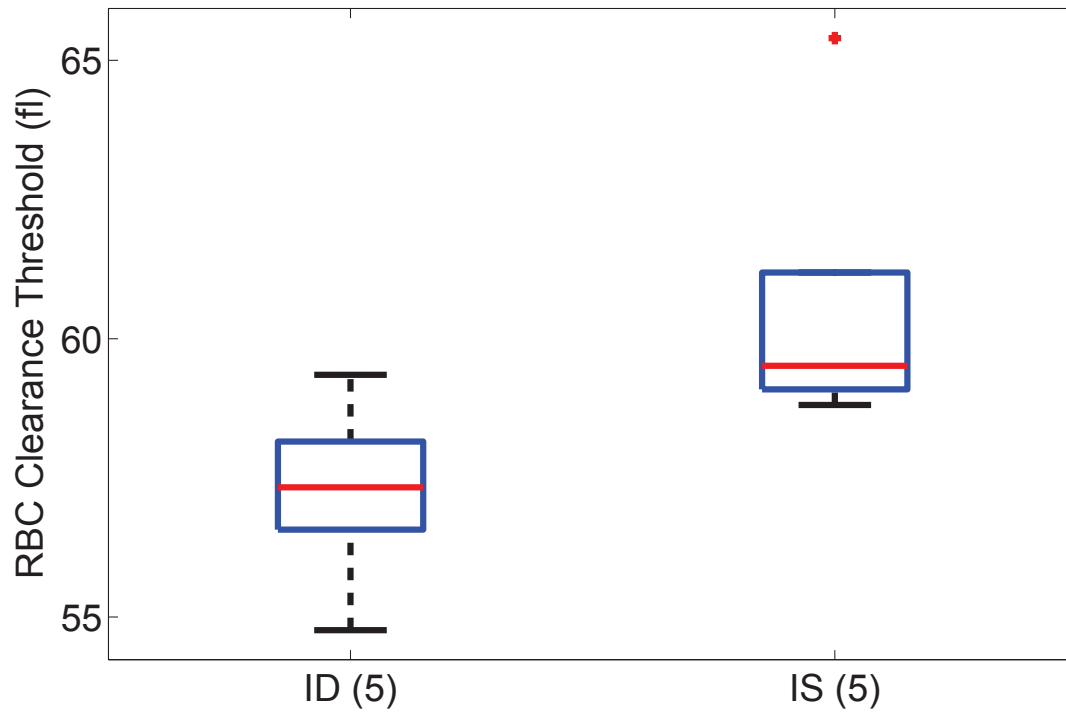

**Figure S3. Dimensional RBC clearance thresholds for two-year-old monkeys.** The boxplots compare the volumes below which most RBCs have been cleared. The typical ID animal allows RBCs to circulate longer with smaller volumes than the typical IS animal. Most IS animals have recycled RBCs by the time their volume drops to 59 fl, while some ID animals allow RBCs to circulate until the volume is below 57fl. See Fig. S2 caption for details on boxplots, and see Main Text and Fig. 2 for discussion and estimation of the clearance threshold.
