# Supplementary material
Source: PubMed Central journal article supplement (PMC4086753)

# RDW

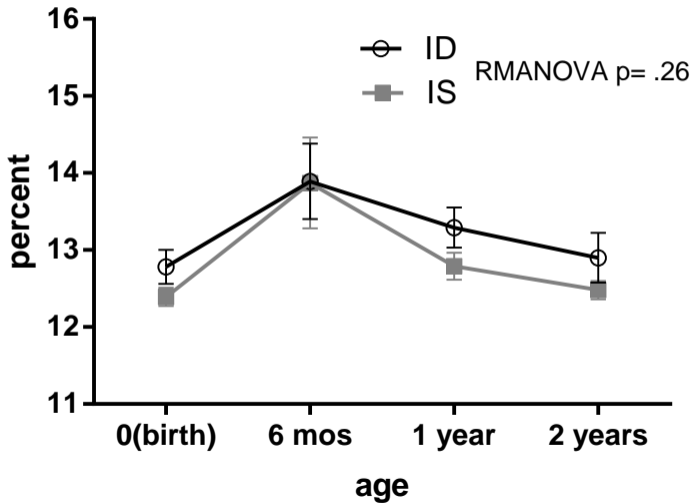

Supplement: NIHMS600781-supplement-Supplemental_Figure_S1.pdf [file NIHMS600781-supplement-Supplemental_Figure_S1.pdf]
